# Supplementary material for: PhoB Regulates the Survival of Bacteroides fragilis in Peritoneal Abscesses
Source: PLoS One. 2013 Jan 15;8(1):e53829. doi: 10.1371/journal.pone.0053829 (PMC3547664; doi:10.1371/journal.pone.0053829)
Supplement: Table S5 — The phoB mutant genes whose expressions were induced >4-fold by Pi starvation. (XLSX) [file pone.0053829.s005.xlsx]

## Sheet: Sheet1
Table S5. The phoB mutant genes whose expressions were induced >4-fold by Pi starvation
Gene name	Function	Fold change a)
BF0003	hypothetical protein	6.39
BF0004	putative glycosyltransferase	7.547
BF0005	hypothetical protein	8.461
BF0006	hypothetical protein	10.908
BF0007	hypothetical protein	15.302
BF0008	hypothetical protein	21.542
BF0009	putative glycosyltransferase	16.461
BF0010	putative glycosyltransferase	22.117
BF0011	putative hemolysin secretion protein	25.961
BF0012	ABC transporter ATP-binding protein	18.929
BF0074	putative iron-sulfur cluster-binding protein	4.891
BF0125	TraE	5.312
BF0218	ribonuclease III	8.621
BF0228	putative glycosyltransferase	5.989
BF0258	hypothetical protein	6.18
BF0271	alpha-galactosidase precursor	8.816
BF0272	hypothetical protein	15.748
BF0273	putative outer membrane protein probably involved in nutrient binding	20.233
BF0347	alpha-1,6-mannanase	7.369
BF0348	hypothetical protein	5.692
BF0349	glutaminase	8.617
BF0379	hypothetical protein	8.707
BF0380	beta-galactosidase	5.878
BF0381	beta-hexosaminidase precursor	9.707
BF0382	hypothetical protein	5.301
BF0387	putative outer membrane protein probably involved in nutrient binding	7.368
BF0390	hypothetical protein	20.386
BF0391	hypothetical protein	19.591
BF0392	periplasmic beta-glucosidase precursor	16.599
BF0393	putative outer membrane protein probably involved in nutrient binding	23.703
BF0394	putative outer membrane protein probably involved in nutrient binding	21.596
BF0409	hypothetical protein	7.24
BF0410	hypothetical protein	6.326
BF0425	putative esterase	10.661
BF0426	hypothetical protein	6.564
BF0427	hypothetical protein	4.203
BF0430	hypothetical protein	4.465
BF0431	beta-lactamase induction signal transducer	5.369
BF0435	serine/threonine protein kinase related protein	6.824
BF0438	hypothetical protein	4.073
BF0439	hypothetical protein	31.808
BF0440	putative outer membrane protein probably involved in nutrient binding	28.885
BF0452	putative sugar transporter	15.53
BF0454	glutamate decarboxylase	12.184
BF0455	putative glutaminase	10.722
BF0464	hypothetical protein	5.568
BF0465	hypothetical protein	4.979
BF0466	hypothetical protein	5.195
BF0527	hypothetical protein	9.78
BF0539	glutamate/gamma-aminobutyrate anti-porter	18.353
BF0540	putative potassium channel subunit	10.621
BF0552	putative outer membrane protein probably involved in nutrient binding	4.029
BF0553	putative outer membrane protein probably involved in nutrient binding	4.199
BF0571	hypothetical protein	18.055
BF0572	hypothetical protein	18.893
BF0576	aspartokinase	72.573
BF0578	potassium-transporting ATPase subunit A	160.84
BF0579	K+-transporting ATPase B chain	237.75
BF0580	K+-transporting ATPase C chain	260.54
BF0581	hypothetical protein	230.17
BF0582	osmosensitive K+ channel histidine kinase	128.3
BF0587	putative outer membrane protein probably involved in nutrient binding	6.473
BF0588	hypothetical protein	9.343
BF0633	hypothetical protein	15.984
BF0634	hypothetical protein	26.034
BF0635	hypothetical protein	25.679
BF0636	hypothetical protein	13.934
BF0674	aminopeptidase N	5.565
BF0675	hypothetical protein	6.857
BF0702	hypothetical protein	7.121
BF0751	hypothetical protein	7.785
BF0752	putative outer membrane protein probably involved in nutrient binding	8.301
BF0832	beta-xylosidase	42.265
BF0833	putative outer membrane protein probably involved in nutrient binding	33.808
BF0834	putative outer membrane protein probably involved in nutrient binding	22.693
BF0835	hypothetical protein	35.862
BF0836	hypothetical protein	21.43
BF0837	hypothetical protein	38.474
BF0838	hypothetical protein	66.602
BF0839	mannan endo-1,4-beta-mannosidase precursor	44.637
BF0840	endo-1,4-beta-mannosidase	42.705
BF0841	periplasmic beta-glucosidase precursor	27.516
BF0842	hypothetical protein	27.658
BF0843	corrinoid methyltransferase protein	64.011
BF0844	hypothetical protein	65.441
BF0845	methylcobamide:CoM methyltransferase MtbA	70.747
BF0846	mannan endo-1,4-beta-mannosidase	58.458
BF0847	hypothetical protein	31.543
BF0848	cation symporter	41.388
BF0849	putative N-acyl-D-glucosamine 2-epimerase	82.806
BF0850	hypothetical protein	11.016
BF0851	hypothetical protein	13.291
BF0852	putative translation initiation inhibitor	13.696
BF0932	hypothetical protein	9.269
BF0940	beta-glucosidase	9.774
BF0954	hypothetical protein	6.957
BF1015	putative lipoprotein	4.685
BF1140	putative acetyltransferase	5.682
BF1180	hypothetical protein	4.156
BF1181	hypothetical protein	6.253
BF1182	thiamine biosynthesis lipoprotein ApbE precursor	7.243
BF1183	hypothetical protein	4.646
BF1191	alpha-glucosidase	42.171
BF1205	endopeptidase Clp ATP-binding chain B	6.599
BF1225	molecular chaperone DnaK	7.926
BF1234	DNA primase	4.291
BF1240	voltage-gated chloride channel protein	4.195
BF1323	alpha-glucosidase	4.8
BF1326	putative outer membrane protein probably involved in nutrient binding	26.765
BF1327	hypothetical protein	18.272
BF1328	putative secreted endoglycosidase	18.541
BF1329	hypothetical protein	18.286
BF1330	exo-alpha sialidase	19.015
BF1352	conserved protein found in conjugate transposon TraM	6.3
BF1409	hypothetical protein	4.702
BF1412	hypothetical protein	4.173
BF1414	penicillin-binding protein 1C	4.803
BF1462	hypothetical protein	11.18
BF1480	RNA polymerase ECF-type sigma factor	4.803
BF1481	putative anti-sigma factor	4.956
BF1482	putative outer membrane protein probably involved in nutrient binding	9.836
BF1483	putative outer membrane protein probably involved in nutrient binding	6.332
BF1484	hypothetical protein	5.538
BF1485	alpha-galactosidase precursor	4.61
BF1487	histidine decarboxylase	5.142
BF1517	aspartate aminotransferase	13.989
BF1518	putative transport protein	20.92
BF1559	hypothetical protein	7.258
BF1560	hypothetical protein	4.692
BF1561	hypothetical protein	4.494
BF1562	hypothetical protein	5.862
BF1563	hypothetical protein	37.386
BF1564	hypothetical protein	18.771
BF1565	hypothetical protein	8.424
BF1585	chondroitinase AC precursor	6.749
BF1592	putative two-component system sensor histidine kinase	4.538
BF1593	two-component system response regulator	4.1
BF1597	ABC transporter ATP-binding protein	4.912
BF1600	dithiobiotin synthetase	8.722
BF1601	putative biotin synthesis protein BioC	11.4
BF1602	8-amino-7-oxononanoate synthase	9.939
BF1603	adenosylmethionine-8-amino-7-oxononanoate aminotransferase	10.788
BF1605	putative outer membrane protein probably involved in nutrient binding	9.537
BF1606	putative outer membrane protein probably involved in nutrient binding	7.418
BF1608	L-lactate permease	7.573
BF1609	hypothetical protein	16.242
BF1610	hypothetical protein	18.305
BF1614	hypothetical protein	5.753
BF1622	2-oxoisovalerate dehydrogenase beta subunit	4.36
BF1623	flavodoxin	4.212
BF1628	hypothetical protein	9.222
BF1629	hypothetical protein	8.724
BF1731	sialate O-acetylesterase	4.135
BF1735	hypothetical protein	6.847
BF1739	putative outer membrane protein involved in nutrient binding	10.64
BF1740	putative outer membrane protein involved in nutrient binding	8.662
BF1741	putative beta-galactosidase	7.712
BF1742	chaperone protein DnaJ	4.055
BF1743	GrpE protein	4.229
BF1752	putative outer membrane protein probably involved in nutrient binding	7.567
BF1753	putative outer membrane protein probably involved in nutrient binding	6.569
BF1828	putative transcriptional regulatory protein UpxY homolog	9.999
BF1829	conserved hypothetical protein UpxZ homolog	8.364
BF1830	hypothetical protein	7.727
BF1831	putative glucose-1-P-cytidylyltransferase	12.085
BF1832	putative phosphoenolpyruvate phosphomutase	9.864
BF1833	putative phosphoenolpyruvate decarboxylase	10.236
BF1834	putative 2-aminoethylphosphonate pyruvate aminotransferase	11.684
BF1835	putative flippase	24.425
BF1836	hypothetical protein	11.764
BF1837	putative alpha-1,2-fucosyltransferase	12.082
BF1838	putative UDP-glucuronic acid epimerase	9.195
BF1839	putative UDP-glucose dehydrogenase	7.237
BF1840	putative glycosyltransferase	15.911
BF1841	putative glycosyltransferase	13.119
BF1842	putative polymerase	14.045
BF1843	putative glycosyltransferase	13.736
BF1846	putative glycosyltransferase	8.823
BF1847	putative dehydratase	8.349
BF1848	putative UndPP-QuiNAc-P-transferase	9.434
BF1849	hypothetical protein	5.345
BF1850	hypothetical protein	4.436
BF1866	hypothetical protein	6.786
BF1910	hypothetical protein	5.809
BF1914	coproporphyrinogen III oxidase	6.858
BF1915	probable transport protein	7.299
BF1963	hypothetical protein	10.933
BF1994	two-component system sensor histidine kinase	8.174
BF1995	putative glycosyltransferase	9.788
BF1996	hypothetical protein	9.737
BF1997	glycosyltransferase involved in cell wall biogenesis	7.262
BF1998	putative glycosyltransferase	4.771
BF2001	putative flippase	4.606
BF2003	putative glycosyltransferase	20.98
BF2005	putative glycosyltransferase	11.761
BF2006	hypothetical protein	6.832
BF2040	putative two-component system sensor histidine kinase	4.064
BF2043	hypothetical protein	4.933
BF2044	hypothetical protein	8.871
BF2045	putative ABC transporter permease	12.012
BF2046	putative ABC transporter ATP-binding protein	5.333
BF2118	hypothetical protein	7.361
BF2119	transcription regulator	11.555
BF2203	hypothetical protein	9.906
BF2215	hypothetical protein	4.308
BF2274	hypothetical protein	13.434
BF2391	outer membrane efflux protein oprM precursor	28.373
BF2392	putative cation efflux pump	21.748
BF2393	putative cation efflux pump	17.07
BF2409	heat shock protein 90	8.23
BF2497	hypothetical protein	4.206
BF2498	hypothetical protein	9.259
BF2499	hypothetical protein	13.291
BF2500	hypothetical protein	5.042
BF2514	cobalamin biosynthesis protein CobN	12.208
BF2515	hypothetical protein	12.304
BF2516	integral membrane protein	12.268
BF2517	hypothetical protein	14.464
BF2547	hypothetical protein	4.282
BF2548	hypothetical protein	4.244
BF2554	Na+/H+ antiporter	7.371
BF2593	Electron transport complex protein RnfA	5.078
BF2594	NADH-ubiquinone oxidoreductase	6.367
BF2595	Electron transport complex protein RnfG	4.997
BF2596	Electron transport complex protein RnfD	6.342
BF2597	Electron transport complex protein RnfC	5.771
BF2598	ferredoxin	6.07
BF2661	putative glycosyltransferase	4.532
BF2662	hypothetical protein	7.727
BF2663	putative acetyl transferase	4.612
BF2678	hypothetical protein	15.517
BF2679	hypothetical protein	8.771
BF2705	two-component system sensor histidine kinase	5.787
BF2760	putative alkaline phosphatase	4.057
BF2761	hypothetical protein	5.119
BF2764	hypothetical protein	4.304
BF2772	hypothetical protein	4.623
BF2890	hypothetical protein	5.573
BF3025	hypothetical protein	4.542
BF3085	hypothetical protein	5.126
BF3086	hypothetical protein	4.207
BF3089	hypothetical protein	5.494
BF3090	Trk system K+ uptake protein TrkH	119.88
BF3198	putative NAD(P)H nitroreductase	6.079
BF3205	hypothetical protein	15.547
BF3209	cytoplasmic alpha-amylase	5.081
BF3210	putative serum resistance protein BrkB	5.889
BF3241	hypothetical protein	4.517
BF3256	beta-hexosaminidase precursor	6.996
BF3257	hypothetical protein	25.208
BF3258	putative outer membrane protein probably involved in nutrient binding	30.194
BF3259	putative anti-sigma factor	7.069
BF3271	hypothetical protein	5.025
BF3272	putative membrane-associated protein	9.215
BF3273	hypothetical protein	9.813
BF3275	beta-glucanase precursor	14.521
BF3278	membrane-bound O-acyltransferase	6.101
BF3279	hypothetical protein	9.88
BF3280	hypothetical protein	13.217
BF3295	alpha-amylase	7.772
BF3304	putative alpha-amylase	44.572
BF3305	hypothetical protein	6.53
BF3306	putative outer membrane protein probably involved in nutrient binding	11.546
BF3307	outer membrane protein probably involved in nutrient binding	6.988
BF3308	LacI family transcriptional regulator	6.249
BF3309	sugar transporter	15.517
BF3350	putative glucose/galactose transporter	5.433
BF3351	putative nitroreductase	4.555
BF3376	hypothetical protein	6.857
BF3377	putative chaperone DnaJ	5.006
BF3389	pyruvate dehydrogenase	6.495
BF3393	hypothetical protein	4.319
BF3394	hypothetical protein	6.555
BF3395	chaperonin GroEL	7.095
BF3396	co-chaperonin GroES	12.143
BF3410	hypothetical protein	4.561
BF3411	hypothetical protein	11.874
BF3412	putative glycosyltransferase	9.2
BF3420	alpha-L-fucosidase precursor	4.78
BF3450	hypothetical protein	12.011
BF3502	hypothetical protein	10.321
BF3511	7-alpha-hydroxysteroid dehydrogenase	5.183
BF3527	putative Na+/H+ antiporter	10.819
BF3538	hypothetical protein	4.679
BF3549	hypothetical protein	8.334
BF3558	hypothetical protein	22.019
BF3559	hypothetical protein	4.845
BF3594	putative glycolate oxidase	4.427
BF3611	putative outer membrane protein probably involved in nutrient binding	4.486
BF3612	hypothetical protein	4.483
BF3613	putative endo-beta-N-acetylglucosaminidase	4.736
BF3614	hypothetical protein	7.108
BF3615	hypothetical protein	5.27
BF3714	polyphosphate kinase	4.939
BF3767	hypothetical protein	4.004
BF3768	putative outer membrane protein	6.178
BF3769	transcriptional regulator	4.901
BF3780	putative outer membrane protein probably involved in nutrient binding	14.545
BF3781	putative outer membrane protein probably involved in nutrient binding	26.886
BF3787	putative chitobiase	6.079
BF3788	putative outer membrane protein probably involved in nutrient binding	8.986
BF3789	putative outer membrane protein probably involved in nutrient binding	23.809
BF3794	choloylglycine hydrolase	5.882
BF3796	hypothetical protein	10.589
BF3797	putative integral membrane protein	6.993
BF3804	putative transmembrane cation efflux protein	7.105
BF3807	putative patatin-like phospholipase	6.448
BF3825	chromosomal replication initiation protein	5.38
BF3827	ribonucleoside-diphosphate reductase alpha chain	8.049
BF3828	4-alpha-glucanotransferase	9.594
BF3866	hypothetical protein	9.53
BF3901	competence protein	6.294
BF3950	putative outer membrane protein probably involved in nutrient binding	4.633
BF3951	putative outer membrane protein probably involved in nutrient binding	7.894
BF4014	hypothetical protein	15.331
BF4037	major outer membrane protein OmpA	7.822
BF4040	hypothetical protein	11.453
BF4041	hypothetical protein	8.924
BF4054	hypothetical protein	5.797
BF4104	hypothetical protein	5.893
BF4187	hypothetical protein	7.695
BF4188	hypothetical protein	10.173
BF4215	L-asparaginase II precursor	4.066
BF4216	hypothetical protein	4.756
BF4250	beta-hexosaminidase precursor	4.825
BF4278	hypothetical protein	50.64
BF4329	putative outer membrane protein probably involved in nutrient binding	5.866
BF4330	hypothetical protein	5.384
BF4367	putative endo-1,4-beta-xylanase	11.171
BF4397	hemolysin erythrocyte lysis protein	4.933
BF4398	hypothetical protein	10.829
BF4399	putative Fe-S oxidoreductase	11.435
BF4400	hypothetical protein	18.245
BF4401	hypothetical protein	14.334
BF4402	putative glycosyltransferase	38.264
BF4409	hypothetical protein	6.186
BF4415	hypothetical protein	7.438
BF4429	DNA binding protein HU family	4.677
BF4432	hypothetical protein	7.621
BF4437	transcription regulator	4.42
BF4488	hypothetical protein	9.968
BF4489	hypothetical protein	4.239
BF4491	two-component system sensor histidine kinase/response regulator hybrid	4.3
BF4531	hypothetical protein	10.432
BF4532	hypothetical protein	12.721
BF4558	hypothetical protein	4.472
BF4559	hypothetical protein	4.577
BFp0002	hypothetical protein	11.539
a) Fold change (relative to wild-type 6.6 mM Pi) was determined from the microarray expression data as described in the Materials and Methods.
